# Supplementary material
Source: Springer Nature journal article supplement (https://www.springermedizin.de/resource/supplementary/13000_2009_221_MOESM2_ESM.pdf/9624100)

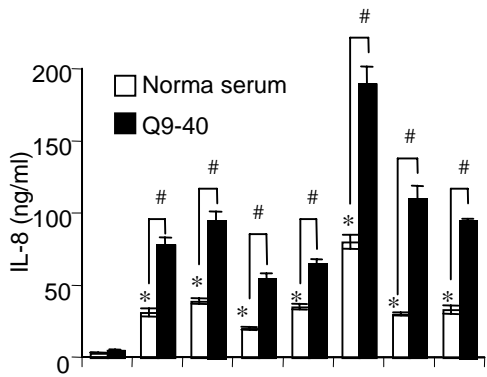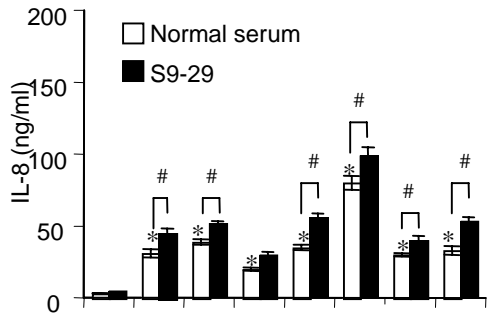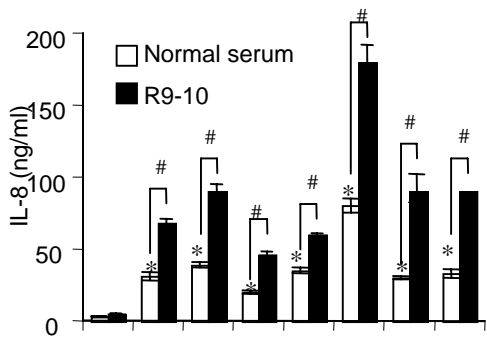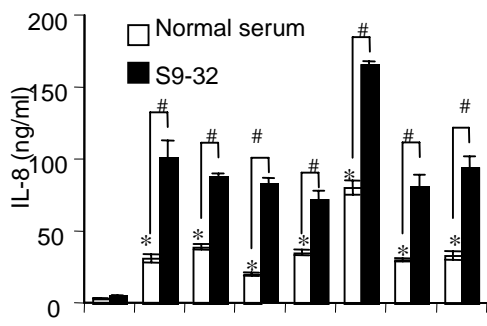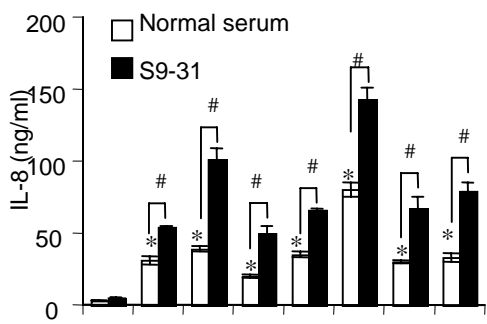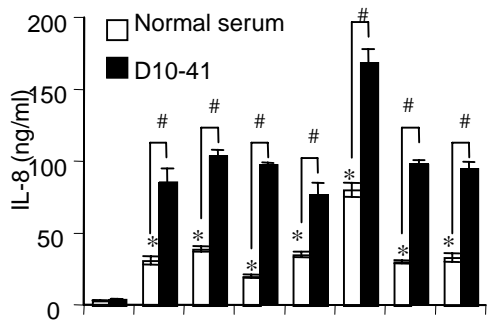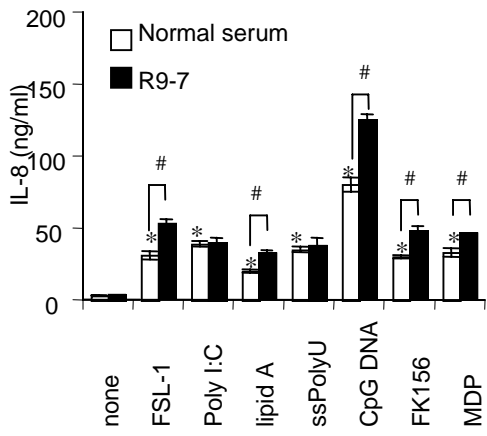

none FSL-1 Poly I:C lipid A ssPolyU CpG DNA FK156 MDP

Supplement: MOESM2 [file 9624100]
